# Supplementary material for: Technical note: Determination of binary gas-phase diffusion coefficients of unstable and adsorbing atmospheric trace gases at low temperature – arrested flow and twin tube method
Source: Copernicus journal article supplement (doi:10.5194/acp-20-3669-2020), 2020-03-26
Supplement: Supplementary file 1 [file acp-20-3669-2020-supplement.zip]

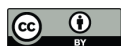

## *Supplement of*

# **Technical note: Determination of binary gas-phase diffusion coefficients of unstable and adsorbing atmospheric trace gases at low temperature – arrested flow and twin tube method**

**Stefan Langenberg et al.**

*Correspondence to:* Stefan Langenberg ([langenberg@uni-bonn.de](mailto:langenberg@uni-bonn.de))

- [acp-20-3669-2020-supplement-title-page.pdf](#)
- [diffusion.R](#)
- [experimental\\_data.csv](#)
- [reference\\_data.csv](#)
- [supplement.pdf](#)

The copyright of individual parts of the supplement might differ from the CC BY 4.0 License.
