# Supplementary material for: Technical note: Determination of binary gas-phase diffusion coefficients of unstable and adsorbing atmospheric trace gases at low temperature – arrested flow and twin tube method
Source: Copernicus journal article supplement (doi:10.5194/acp-20-3669-2020), 2020-03-26
Supplement: Supplementary file 2 [file acp-20-3669-2020-supplement.zip]

Archive with 5 entries (5 files):
- experimental_data.csv
- acp-20-3669-2020-supplement-title-page.pdf
- diffusion.R
- reference_data.csv
- supplement.pdf
