# Supplementary material for: Technical note: Determination of binary gas-phase diffusion coefficients of unstable and adsorbing atmospheric trace gases at low temperature – arrested flow and twin tube method
Source: Copernicus journal article supplement (doi:10.5194/acp-20-3669-2020), 2020-03-26
Supplement: Supplementary file 2 [file acp-20-3669-2020-supplement.zip › experimental_data.csv]

#			Mole fraction	Temperature	Diffusion coefficient at 273 K and 1.013 bar	Relative uncertainty	First order loss rate
# UCUM				K	cm2/s		1/s
Tracer	Carrier	Method	x	T	D	relError	k1
NO[2]	N[2]	TT	7.90E-005	298	0.1720
NO[2]	N[2]	TT	7.90E-005	298	0.1730
NO[2]	N[2]	TT	7.90E-005	298	0.1720
NO[2]	N[2]	TT	7.90E-005	319	0.1970
NO[2]	N[2]	TT	7.90E-005	313	0.1880
NO[2]	N[2]	TT	7.90E-005	304	0.1770
NO[2]	N[2]	TT	7.90E-005	303	0.1740
NO[2]	N[2]	TT	7.90E-005	299	0.1740
NO[2]	N[2]	TT	7.90E-005	296	0.1670
NO[2]	N[2]	TT	7.90E-005	295	0.1660
NO[2]	N[2]	TT	7.90E-005	289	0.1630
NO[2]	N[2]	TT	7.90E-005	284	0.1630
NO[2]	N[2]	TT	7.90E-005	284	0.1600
NO[2]	N[2]	TT	7.90E-005	283	0.1600
NO[2]	N[2]	TT	7.90E-005	279	0.1510
NO[2]	N[2]	TT	7.90E-005	275	0.1450
NO[2]	N[2]	TT	7.90E-005	273	0.1490
NO[2]	N[2]	TT	7.90E-005	264	0.1340
NO[2]	N[2]	TT	7.90E-005	255	0.1250
NO[2]	N[2]	TT	7.90E-005	245	0.1160
NO[2]	N[2]	TT	7.90E-005	245	0.1190
NO[2]	N[2]	TT	7.90E-005	236	0.0990
NO[2]	N[2]	TT	7.90E-005	236	0.0970
NO[2]	N[2]	TT	7.90E-005	231	0.0870
NO[2]	N[2]	TT	7.90E-005	227	0.0780
NO[2]	N[2]	TT	7.90E-005	217	0.0620
NO[2]	N[2]	TT	7.90E-005	208	0.0470
NO[2]	N[2]	TT	7.90E-005	208	0.0470
NO[2]	N[2]	TT	7.90E-005	204	0.0430
NO[2]	N[2]	TT	3.09E-004	298	0.1720
NO[2]	N[2]	TT	3.09E-004	285	0.1570
NO[2]	N[2]	TT	3.09E-004	275	0.1450
NO[2]	N[2]	TT	3.09E-004	270	0.1400
NO[2]	N[2]	TT	3.09E-004	265	0.1320
NO[2]	N[2]	TT	3.09E-004	260	0.1290
NO[2]	N[2]	TT	3.09E-004	256	0.1240
NO[2]	N[2]	TT	3.09E-004	251	0.1210
NO[2]	N[2]	TT	3.09E-004	247	0.1130
NO[2]	N[2]	TT	3.09E-004	241	0.1060
NO[2]	N[2]	TT	3.09E-004	236	0.0960
NO[2]	N[2]	TT	3.09E-004	232	0.0820
NO[2]	N[2]	TT	3.09E-004	227	0.0750
NO[2]	N[2]	TT	3.09E-004	223	0.0710
NO[2]	N[2]	TT	4.93E-004	298	0.1720
NO[2]	N[2]	TT	4.93E-004	285	0.1550
NO[2]	N[2]	TT	4.93E-004	265	0.1330
NO[2]	N[2]	TT	4.93E-004	256	0.1230
NO[2]	N[2]	TT	4.93E-004	247	0.1090
NO[2]	N[2]	TT	4.93E-004	236	0.0970
NO[2]	N[2]	TT	4.93E-004	227	0.0790
NO[2]	He	TT	1.44E-005	298	0.6190
NO[2]	He	TT	1.44E-005	299	0.6230
NO[2]	He	TT	1.44E-005	299	0.6180
NO[2]	He	TT	1.44E-005	285	0.5660
NO[2]	He	TT	1.44E-005	275	0.5310
NO[2]	He	TT	1.44E-005	265	0.4950
NO[2]	He	TT	1.44E-005	256	0.4600
NO[2]	He	TT	1.44E-005	247	0.4320
NO[2]	He	TT	1.44E-005	236	0.3760
NO[2]	He	TT	1.44E-005	227	0.2940
NO[2]	He	TT	1.44E-005	217	0.2420
NO[2]	He	TT	1.44E-005	213	0.2220
NO[2]	He	TT	1.44E-005	203	0.1920
NO[2]	He	TT	1.90E-005	298	0.6100
NO[2]	He	TT	1.90E-005	289	0.5770
NO[2]	He	TT	1.90E-005	280	0.5440
NO[2]	He	TT	1.90E-005	270	0.5080
NO[2]	He	TT	1.90E-005	260	0.4710
NO[2]	He	TT	1.90E-005	251	0.4350
NO[2]	He	TT	1.90E-005	241	0.3910
NO[2]	He	TT	1.90E-005	232	0.3350
NO[2]	He	TT	1.90E-005	223	0.2680
NO[2]	He	TT	1.90E-005	214	0.2380
NO[2]	He	TT	1.90E-005	202	0.1890
N[2]O[5]	He	AF		298	0.2940	0.0160	0.0184
N[2]O[5]	He	AF		298	0.3310	0.0070	0.0126
N[2]O[5]	He	AF		297	0.3050	0.0100	0.0126
N[2]O[5]	He	AF		297	0.2950	0.0100	0.0192
N[2]O[5]	He	AF		297	0.2930	0.0150
N[2]O[5]	He	AF		297	0.3030	0.0100	0.0110
N[2]O[5]	He	AF		297	0.3160	0.0190	0.0140
N[2]O[5]	He	AF		294	0.2940	0.0120	0.0144
N[2]O[5]	He	AF		294	0.2870	0.0080	0.0155
N[2]O[5]	He	AF		293	0.2780	0.0100	0.0153
N[2]O[5]	He	AF		293	0.2830	0.0080	0.0160
N[2]O[5]	He	AF		289	0.3020	0.0100	0.0107
N[2]O[5]	He	AF		289	0.3020	0.0080	0.0084
N[2]O[5]	He	AF		289	0.2820	0.0170	0.0114
N[2]O[5]	He	AF		284	0.2700	0.0100	0.0078
N[2]O[5]	He	AF		284	0.2910	0.0080	0.0111
N[2]O[5]	He	AF		284	0.2840	0.0100	0.0110
N[2]O[5]	He	AF		284	0.2920	0.0120	0.0116
N[2]O[5]	He	AF		284	0.3110	0.0090	0.0107
N[2]O[5]	He	AF		284	0.3120	0.0090	0.0110
N[2]O[5]	He	AF		284	0.3000	0.0120	0.0131
N[2]O[5]	He	AF		279	0.2970	0.0130	0.0074
N[2]O[5]	He	AF		274	0.2540	0.0140	0.0095
N[2]O[5]	He	AF		274	0.2750	0.0100	0.0074
N[2]O[5]	He	AF		274	0.2470	0.0100	0.0106
N[2]O[5]	He	AF		273	0.2450	0.0100	0.0096
N[2]O[5]	He	AF		273	0.2480	0.0140	0.0096
N[2]O[5]	He	AF		265	0.2790	0.0070	0.0075
N[2]O[5]	He	AF		265	0.2800	0.0080	0.0060
N[2]O[5]	He	AF		265	0.2820	0.0090	0.0059
N[2]O[5]	He	AF		265	0.2620	0.0100	0.0060
N[2]O[5]	He	AF		265	0.2400	0.0140	0.0093
N[2]O[5]	He	AF		263	0.2990	0.0050	0.0068
N[2]O[5]	He	AF		255	0.2470	0.0110	0.0106
N[2]O[5]	He	AF		255	0.2500	0.0090	0.0110
N[2]O[5]	He	AF		255	0.2540	0.0060	0.0055
N[2]O[5]	He	AF		255	0.2360	0.0120	0.0090
N[2]O[5]	He	AF		250	0.2560	0.0110	0.0062
N[2]O[5]	He	AF		245	0.2620	0.0090	0.0068
N[2]O[5]	He	AF		245	0.2430	0.0110	0.0110
N[2]O[5]	N[2]	AF		298	0.0780	0.0170	0.0080
N[2]O[5]	N[2]	AF		296	0.0730	0.0180	0.0103
N[2]O[5]	N[2]	AF		296	0.0770	0.0070	0.0080
N[2]O[5]	N[2]	AF		296	0.0800	0.0150	0.0084
N[2]O[5]	N[2]	AF		294	0.0800	0.0240	0.0089
N[2]O[5]	N[2]	AF		285	0.0770	0.0160	0.0064
N[2]O[5]	N[2]	AF		274	0.0700	0.0140	0.0063
N[2]O[5]	N[2]	AF		265	0.0690	0.0110	0.0050
N[2]O[5]	N[2]	AF		265	0.0680	0.0140	0.0049
N[2]O[5]	N[2]	AF		255	0.0660	0.0130	0.0042
N[2]O[5]	N[2]	AF		255	0.0670	0.0090	0.0045
N[2]O[5]	N[2]	AF		246	0.0610	0.0130	0.0047
ClONO[2]	N[2]	AF		298	0.1080	0.0140
ClONO[2]	N[2]	AF		298	0.1020	0.0090
ClONO[2]	N[2]	AF		297	0.0940	0.0150
ClONO[2]	N[2]	AF		296	0.1060	0.0110
ClONO[2]	N[2]	AF		294	0.0990	0.0080
ClONO[2]	N[2]	AF		293	0.1000	0.0130
ClONO[2]	N[2]	AF		293	0.0990	0.0080
ClONO[2]	N[2]	AF		285	0.0980	0.0120
ClONO[2]	N[2]	AF		284	0.0880	0.0070
ClONO[2]	N[2]	AF		279	0.0960	0.0130
ClONO[2]	N[2]	AF		278	0.0930	0.0090
ClONO[2]	N[2]	AF		273	0.0820	0.0060
ClONO[2]	N[2]	AF		263	0.0830	0.0080
ClONO[2]	N[2]	AF		263	0.0750	0.0200
ClONO[2]	N[2]	AF		259	0.0750	0.0150
ClONO[2]	N[2]	AF		254	0.0690	0.0170
ClONO[2]	N[2]	AF		245	0.0590	0.0240
ClONO[2]	N[2]	AF		234	0.0630	0.0220
ClONO[2]	He	AF		304	0.3860	0.0120
ClONO[2]	He	AF		304	0.3730	0.0130
ClONO[2]	He	AF		304	0.3400	0.0170
ClONO[2]	He	AF		297	0.3560	0.0110
ClONO[2]	He	AF		297	0.3480	0.0150
ClONO[2]	He	AF		297	0.3470	0.0390
ClONO[2]	He	AF		296	0.3550	0.0090
ClONO[2]	He	AF		296	0.3550	0.0090
ClONO[2]	He	AF		296	0.3480	0.0100
ClONO[2]	He	AF		295	0.3170	0.0180
ClONO[2]	He	AF		294	0.3550	0.0110
ClONO[2]	He	AF		294	0.3420	0.0130
ClONO[2]	He	AF		289	0.3540	0.0110
ClONO[2]	He	AF		279	0.3160	0.0140
ClONO[2]	He	AF		279	0.3110	0.0130
ClONO[2]	He	AF		275	0.3380	0.0200
ClONO[2]	He	AF		275	0.3090	0.0100
ClONO[2]	He	AF		275	0.2850	0.0230
ClONO[2]	He	AF		260	0.3080	0.0150
ClONO[2]	He	AF		255	0.2960	0.0170
ClONO[2]	He	AF		245	0.2660	0.0110
ClONO[2]	He	AF		236	0.2120	0.0290
O[3]	air	AF	4.00E-05	302.7	0.1866	0.0290
O[3]	air	AF	4.00E-05	293.7	0.1746	0.0130
O[3]	air	AF	4.00E-05	283	0.1618	0.0210
O[3]	air	AF	4.00E-05	271.6	0.1521	0.0140
O[3]	air	AF	4.00E-05	262.7	0.1515	0.0160
O[3]	air	AF	4.00E-05	251.6	0.1316	0.0120
O[3]	air	AF	4.00E-05	242.4	0.1184	0.0160
O[3]	air	AF	4.00E-05	231.7	0.1087	0.0200
O[3]	air	AF	4.00E-05	222.9	0.1060	0.0110
O[3]	air	AF	4.00E-05	217.3	0.0955	0.0140
O[3]	air	AF	4.00E-05	212.8	0.0944	0.0380
O[3]	air	AF	4.00E-05	203.6	0.0836	0.0180
O[3]	air	AF	4.00E-05	195.5	0.0798	0.0100
CH[4]	air	AF	0.001	310.9	0.2570	0.0106
CH[4]	air	AF	0.001	293.9	0.2280	0.0108
CH[4]	air	AF	0.001	284	0.2220	0.0108
CH[4]	air	AF	0.001	273.6	0.2030	0.1020
CH[4]	air	AF	0.001	269.1	0.2010	0.0101
CH[4]	air	AF	0.001	262.6	0.1920	0.0101
CH[4]	air	AF	0.001	252.3	0.1780	0.0101
CH[4]	air	AF	0.001	242.5	0.1680	0.0106
CH[4]	air	AF	0.001	233.2	0.1540	0.0102
CH[4]	air	AF	0.001	222.8	0.1430	0.1030
CH[4]	air	AF	0.001	209.9	0.1290	0.0106
CH[4]	air	AF	0.001	196.8	0.1150	0.0105
CH[4]	He	AF	0.001	273.9	0.6231	0.0074
CH[4]	He	AF	0.001	262.28	0.5750	0.0079
CH[4]	He	AF	0.001	252.7	0.5450	0.0083
CH[4]	He	AF	0.001	243.05	0.5054	0.0086
CH[4]	He	AF	0.001	222.95	0.4380	0.0082
CH[4]	He	AF	0.001	213.95	0.4111	0.0078
CH[4]	He	AF	0.001	196.75	0.3561	0.0080
C[2]H[4]	air	AF	0.001	295.05	0.1721	0.0118
C[2]H[4]	air	AF	0.001	283.95	0.1617	0.0104
C[2]H[4]	air	AF	0.001	273.33	0.1493	0.0104
C[2]H[4]	air	AF	0.001	252.3	0.1306	0.0104
C[2]H[4]	air	AF	0.001	232.3	0.1124	0.0102
C[2]H[4]	air	AF	0.001	221.48	0.1028	0.0127
C[2]H[4]	air	AF	0.001	211.6	0.0949	0.0104
C[2]H[4]	air	AF	0.001	196.8	0.0822	0.0119
C[2]H[4]	He	AF	0.001	283.9	0.5302	0.0110
C[2]H[4]	He	AF	0.001	273.1	0.4953	0.0103
C[2]H[4]	He	AF	0.001	262.2	0.4615	0.0101
C[2]H[4]	He	AF	0.001	253	0.4409	0.0104
C[2]H[4]	He	AF	0.001	244.4	0.4152	0.0114
C[2]H[4]	He	AF	0.001	232	0.3844	0.0104
C[2]H[4]	He	AF	0.001	224.9	0.3585	0.0102
C[2]H[4]	He	AF	0.001	197.4	0.2873	0.0105
NO	He	AF	1.00E-04	304	0.7899	0.0101
NO	He	AF	1.00E-04	293.95	0.7559	0.0101
NO	He	AF	1.00E-04	284.03	0.7111	0.0101
NO	He	AF	1.00E-04	273.9	0.6603	0.0101
NO	He	AF	1.00E-04	263.75	0.6232	0.0101
NO	He	AF	1.00E-04	253.35	0.5790	0.0102
NO	He	AF	1.00E-04	242.45	0.5389	0.0101
NO	He	AF	1.00E-04	233.23	0.5054	0.0101
NO	He	AF	1.00E-04	222.55	0.4666	0.0102
NO	He	AF	1.00E-04	212.65	0.4296	0.0102
NO	He	AF	1.00E-04	196.3	0.3803	0.0102
CH[4]	He	TT	0.004	201.4	0.3640	0.0129
CH[4]	He	TT	0.004	205.8	0.3780	0.0114
CH[4]	He	TT	0.004	215.9	0.4110	0.0118
CH[4]	He	TT	0.004	225.5	0.4410	0.0107
CH[4]	He	TT	0.004	235.6	0.4720	0.0117
CH[4]	He	TT	0.004	245.5	0.5060	0.0108
CH[4]	He	TT	0.004	255.1	0.5410	0.0126
CH[4]	He	TT	0.004	264.9	0.5750	0.0109
CH[4]	He	TT	0.004	274.5	0.6130	0.0107
CH[4]	He	TT	0.004	283.7	0.6480	0.0125
CH[4]	He	TT	0.004	293.8	0.6920	0.0139
CH[4]	He	TT	0.004	284.5	0.6570	0.0111
CH[4]	He	TT	0.004	274.9	0.6180	0.0118
CH[4]	He	TT	0.004	265.4	0.5840	0.0117
CH[4]	He	TT	0.004	255.8	0.5470	0.0105
CH[4]	He	TT	0.004	246.5	0.5120	0.0126
CH[4]	He	TT	0.004	237.1	0.4760	0.0110
CH[4]	He	TT	0.004	227.8	0.4470	0.0107
CH[4]	He	TT	0.004	226	0.4420	0.0114
CH[4]	He	TT	0.004	211.8	0.3980	0.0107
CH[4]	He	TT	0.004	206	0.3790	0.0121
C[2]H[4]	He	TT	0.004	217.5	0.3230	0.0102
C[2]H[4]	He	TT	0.004	226.4	0.3480	0.0108
C[2]H[4]	He	TT	0.004	235.8	0.3700	0.0104
C[2]H[4]	He	TT	0.004	245.2	0.3950	0.0104
C[2]H[4]	He	TT	0.004	254.9	0.4230	0.0101
C[2]H[4]	He	TT	0.004	264.7	0.4530	0.0105
C[2]H[4]	He	TT	0.004	274.3	0.4460	0.0101
C[2]H[4]	He	TT	0.004	284.1	0.5070	0.0116
C[2]H[4]	He	TT	0.004	294	0.5410	0.0102
C[2]H[4]	He	TT	0.004	284.4	0.5110	0.0111
C[2]H[4]	He	TT	0.004	274.1	0.4730	0.0136
C[2]H[4]	He	TT	0.004	264.1	0.4120	0.0117
C[2]H[4]	He	TT	0.004	254.6	0.4180	0.0111
C[2]H[4]	He	TT	0.004	245.7	0.3990	0.0194
C[2]H[4]	He	TT	0.004	236.5	0.3680	0.0111
C[2]H[4]	He	TT	0.004	227.4	0.3440	0.0160
C[2]H[4]	He	TT	0.004	225.9	0.3430	0.0130
C[2]H[4]	air	TT	0.005	203.3	0.0745	0.0060
C[2]H[4]	air	TT	0.005	208.1	0.0783	0.0030
C[2]H[4]	air	TT	0.005	216.6	0.0857	0.0040
C[2]H[4]	air	TT	0.005	225.8	0.0934	0.0003
C[2]H[4]	air	TT	0.005	235.7	0.1015	0.0030
C[2]H[4]	air	TT	0.005	244.9	0.1073	0.0080
C[2]H[4]	air	TT	0.005	249.7	0.1109	0.0004
C[2]H[4]	air	TT	0.005	264	0.1263	0.0040
C[2]H[4]	air	TT	0.005	278.6	0.1391	0.0030
C[2]H[4]	air	TT	0.005	293.5	0.1566	0.0070
