# Supplementary material for: Technical note: Determination of binary gas-phase diffusion coefficients of unstable and adsorbing atmospheric trace gases at low temperature – arrested flow and twin tube method
Source: Copernicus journal article supplement (doi:10.5194/acp-20-3669-2020), 2020-03-26
Supplement: Supplementary file 2 [file acp-20-3669-2020-supplement.zip › reference_data.csv]

#				Mole fraction	Temperature	Diffusion coefficient at 1.013 bar
# UCUM					K	cm2/s
Tracer	Carrier	Reference	DOI	x	T	D
CH[4]	He	Dunlop and Bignell (1987)	https://doi.org/10.1016/0378-4371(87)90009-4		200	0.3461
CH[4]	He	Dunlop and Bignell (1987)	https://doi.org/10.1016/0378-4371(87)90009-4		230	0.4372
CH[4]	He	Dunlop and Bignell (1987)	https://doi.org/10.1016/0378-4371(87)90009-4		260	0.5367
CH[4]	He	Dunlop and Bignell (1987)	https://doi.org/10.1016/0378-4371(87)90009-4		280	0.6065
CH[4]	He	Dunlop and Bignell (1987)	https://doi.org/10.1016/0378-4371(87)90009-4		290	0.6427
CH[4]	He	Dunlop and Bignell (1987)	https://doi.org/10.1016/0378-4371(87)90009-4		300	0.6799
CH[4]	He	Dunlop and Bignell (1987)	https://doi.org/10.1016/0378-4371(87)90009-4		310	0.7182
CH[4]	He	McCoy and Moffat (1986)	https://doi.org/10.1080/00986448608911765		297.15	0.614
C[2]H[4]	He	Dunlop and Bignell (1990)	https://doi.org/10.1063/1.458908		280	0.53
C[2]H[4]	He	Dunlop and Bignell (1990)	https://doi.org/10.1063/1.458908		300	0.5936
C[2]H[4]	He	Dunlop and Bignell (1990)	https://doi.org/10.1063/1.458908		320	0.663
CH[4]	air	Cowie and Watts (1971)	https://doi.org/10.1139/v71-011		298.2	0.2168
CH[4]	air	Gwertsiteli et. al. (1961)			293	0.21
CH[4]	air	Massman (1998)	https://doi.org/10.1016/S1352-2310(97)00391-9		273.2	0.1952
NO	He	Dunlop and Bignell (1992)	https://doi.org/10.1002/bbpc.19920961211		280.0	0.6515
NO	He	Dunlop and Bignell (1992)	https://doi.org/10.1002/bbpc.19920961211		290.0	0.6893
NO	He	Dunlop and Bignell (1992)	https://doi.org/10.1002/bbpc.19920961211		300.0	0.7280
